# Supplementary material for: Arrhythmia and Heart Rate Variability during Long Interdialytic Periods in Patients on Maintenance Hemodialysis: Prospective Observational Cohort Study
Source: MDPI journal article supplement (doi:10.3390/jcm12010265), 2022-12-29
Supplement: s1 [file s1]

**Table S1.** HRV parameter changes in patients with and without significant arrhythmias

|                    | Without significant arrhythmia |                 | Significant arrhythmia |                 |
|--------------------|--------------------------------|-----------------|------------------------|-----------------|
|                    | Mean change per day            | <i>p</i> -value | Mean change per day    | <i>p</i> -value |
| <b>SDNN</b>        | -0.003 (-0.029–0.022)          | 0.793           | 0.032 (0.007–0.057)    | 0.013           |
| <b>SDANN</b>       | 0.021 (-0.003–0.044)           | 0.084           | 0.044 (0.022–0.067)    | <0.001          |
| <b>RMSSD</b>       | 0.146 (0.113–0.178)            | <0.001          | 0.053 (0.025–0.082)    | <0.001          |
| <b>pNN50</b>       | 0.290 (0.209–0.372)            | <0.001          | 0.060 (-0.017–0.137)   | 0.124           |
| <b>VLF</b>         | 0.083 (0.053–0.113)            | <0.001          | 0.028 (0.001–0.056)    | 0.042           |
| <b>LF</b>          | 0.044 (0.024–0.064)            | <0.001          | 0.001 (-0.019–0.021)   | 0.922           |
| <b>HF</b>          | 0.078 (0.059–0.098)            | <0.001          | 0.012 (-0.005–0.028)   | 0.161           |
| <b>LF/HF ratio</b> | -0.118 (-0.177–0.059)          | <0.001          | -0.015 (-0.074–0.043)  | 0.605           |

The statistical results were acquired from linear mixed models using Satterthwaite approximations for the degrees of freedom. The mean changes in HRV parameters per day are presented as estimates with 95% confidence intervals. SDNN, SDANN, RMSSD, pNN50, and the LF/HF ratio values were natural log-transformed, and the VLF, LF, and HF values were square root-transformed. SA, significant arrhythmia; SE, standard error; SDNN, standard deviation (SD) of normal-to-normal intervals during an hour; SDANN, SD of the averages of the NN intervals in all five-minute segments during an hour; RMSSD, square root of the mean square of the differences between adjacent NN intervals; pNN50, percentage of the number of pairs of adjacent NN R-R intervals differing by > 50 ms in the total NN intervals; VLF, very-low-frequency (0.003–0.04 Hz) power; LF, low-frequency (0.04–0.15 Hz) power; HF, high-frequency (0.15–0.40 Hz) power.

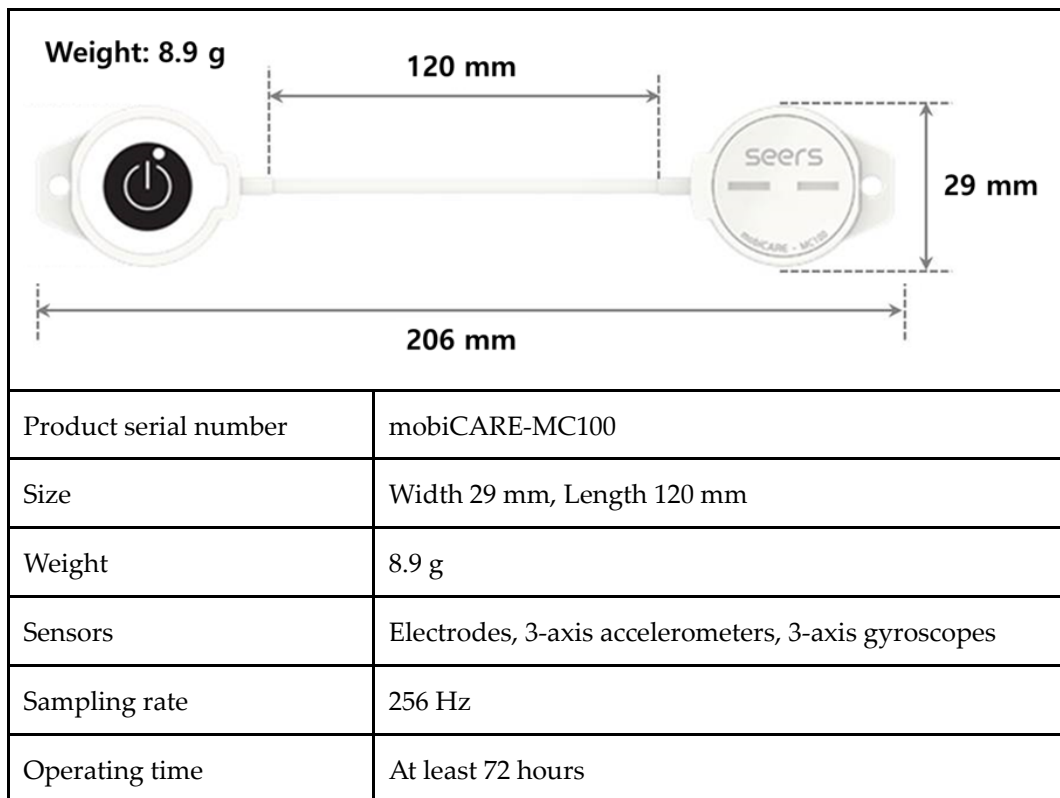

**Figure S1.** Image and detailed specifications of the patch-type ECG monitoring device.
